# Supplementary material for: Prevalence of β-lactam (blaTEM) and Metronidazole (nim) Resistance Genes in the Oral Cavity of Greek Subjects
Source: PubMed Central journal article supplement — Open Dent J. 2016 Mar 28;10:89–98. doi: 10.2174/1874210601610010089 (PMC4820533; doi:10.2174/1874210601610010089), 2016-03-28
Supplement: TODENTJ-10-89_SD1.pdf [file TODENTJ-10-89_SD1.pdf]

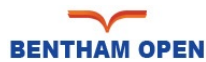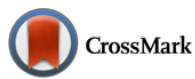

## The Open Dentistry Journal Supplementary Material

Content list available at: [www.benthamopen.com/TODENTJ/](http://www.benthamopen.com/TODENTJ/)

DOI: 10.2174/1874210601610010070

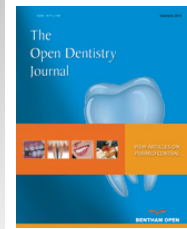

### Prevalence of $\beta$ -lactam ( $bla_{TEM}$ ) and Metronidazole ( $nim$ ) Resistance Genes in the Oral Cavity of Greek Subjects

Georgios Koukos<sup>1,\*</sup>, Antonios Konstantinidis<sup>2</sup>, Lazaros Tsalikis<sup>2</sup>, Minas Arsenakis<sup>3</sup>, Theodora Slini<sup>4</sup> and Dimitra Sakellari<sup>2</sup>

<sup>1</sup> 251 General Air Force Hospital, Department of Periodontology, Athens, Greece

<sup>2</sup> Department of Preventive Dentistry, Periodontology and Implant Biology, Dental School, Aristotle University of Thessaloniki, Greece

<sup>3</sup> Department of Genetics and Molecular Biology, School of Biology, Aristotle University of Thessaloniki, Greece

<sup>4</sup> Department of Mechanical Engineering, Aristotle University of Thessaloniki, Greece

#### Supplementary file 1

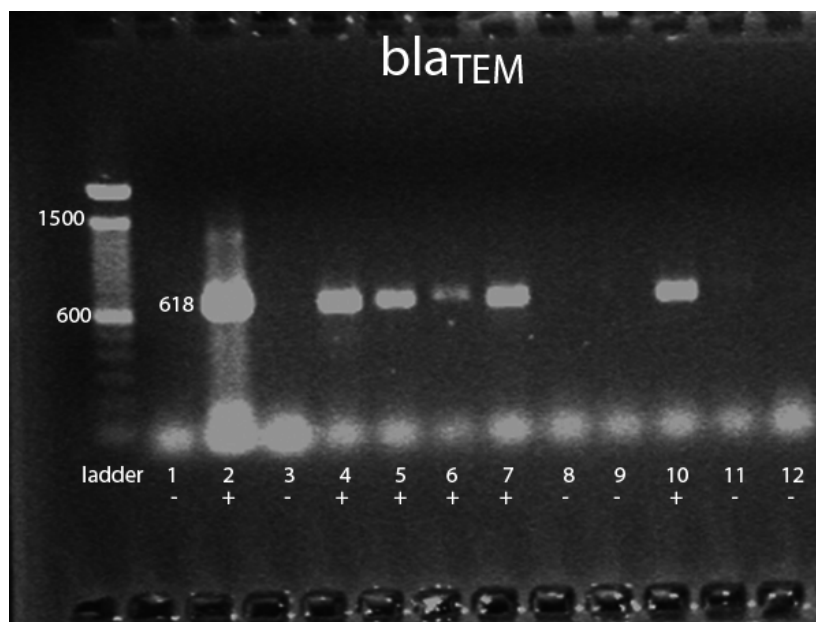

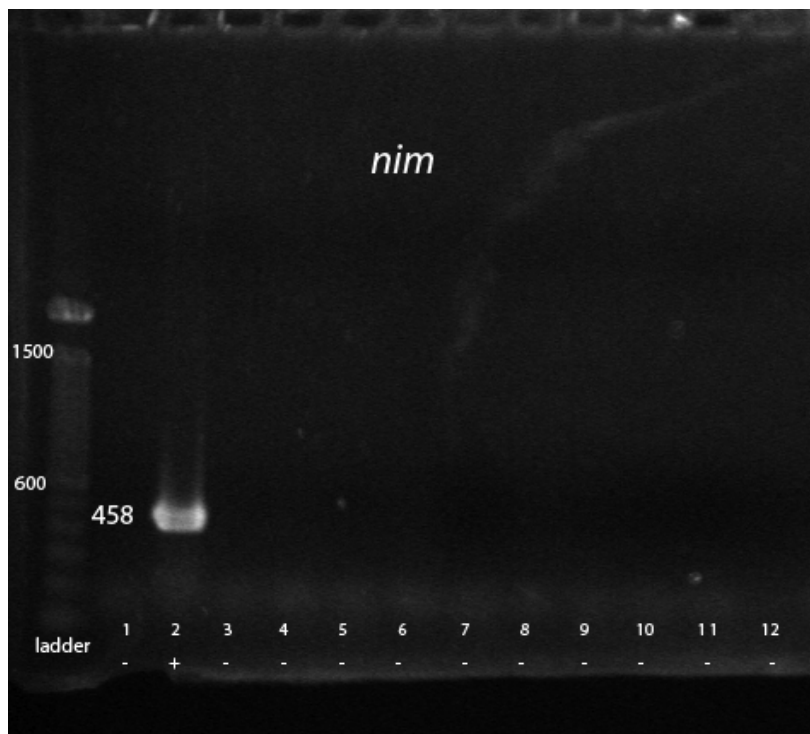

Agarose gel electrophoresis for *nim*. Amplicon size 458bp.  
Lane 0: Molecular weight standards (ladder).  
Negative lanes: 1 (Negative control), 3, 4-12.  
Positive lanes: 2 (Positive control).
